# Supplementary material
Source: PubMed Central journal article supplement (PMC6195217)
Supplement: NIHMS611402-supplement-1.pdf [file NIHMS611402-supplement-1.pdf]

**SUPPLEMENTAL DATA:**

**Supplemental Table 1: Composition of nanoparticles**

| <b>Nanoparticles</b> | <b>No. of individual peptide components</b> | <b>Amount of individual peptide/NP<br/>(ug of individual peptide /mg of NP)</b> |
|----------------------|---------------------------------------------|---------------------------------------------------------------------------------|
| NP-FMP               | 1                                           | 9                                                                               |
| NP-CEF               | 32                                          | 0.5625                                                                          |
| NP-SOX2              | 22                                          | 4.1616                                                                          |

**Supplemental Table 2: Description of individual peptide components of SOX2 pool peptide, encapsulated in NP-SOX2**

| Serial Number | SOX2 Peptide Sequence |
|---------------|-----------------------|
|               |                       |
| 1             | LGAEWKLLSETEKR        |
| 2             | EWKLLSETEKRPF         |
| 3             | LLSETEKRPFIDEAK       |
| 4             | TEKRPFIDEAKRLRA       |
| 5             | PFIDEAKRLRALHMK       |
| 6             | EAKRLRALHMKEH         |
| 7             | KRLRALHMKEHPDYK       |
| 8             | ALHMKEHPDYKYRPR       |
| 9             | KEHPDYKYRPRRKT        |
| 10            | DYKYRPRRKTTLMK        |
| 11            | RPRRKTTLMKKDKY        |
| 12            | KTKTLMKKDKYTLP        |
| 13            | LMKKDKYTLPGGLLA       |
| 14            | DKYTLPGGLLAPGG        |
| 15            | TLPGGLLAPGGNSMA       |
| 16            | GLLAPGGNSMASGVG       |
| 17            | PGGNSMASGVGVGAG       |
| 18            | SMASGVGVGAGLGAG       |
| 19            | GVGVGAGLGAGVNQR       |
| 20            | GAGLGAGVNQRMDSY       |
| 21            | GAGVNQRMDSYAHM        |
| 22            | VNQRMDSYAHMNGWS       |

**Supplemental Table 3: Description of individual peptide components of CEF pool peptide used for re-stimulation of cells primed with NP-CEF (shown in Fig.3d)**

| Peptide | HLA Allele | Virus       | Protein & Region    | Peptide Sequence |
|---------|------------|-------------|---------------------|------------------|
| Pep 1   | A1         | INFLUENZA A | PB1 (591 – 599)     | VSDGGPNLY        |
| Pep 2   | A2         | EBV         | BMLF1 (259 – 267)   | GLCTLVAML        |
| Pep 3   | A2         | INFLUENZA A | MATRIX 1 (58 – 66)  | GILGFVFTL        |
| Pep 4   | A3         | INFLUENZA A | NP (265 – 273)      | ILRGVAHK         |
| Pep 5   | A3         | EBV         | BRLF1 (148 -156)    | RVRAYTYSK        |
| Pep 6   | A3         | EBV         | EBNA 3A (603 – 611) | RLRAEAQVK        |
| Pep 7   | A11        | EBV         | EBNA 3B (416 – 424) | IVTDFSVIK        |
| Pep 8   | A11        | EBV         | BRLF1 (134 – 143)   | ATIGTAMYK        |
| Pep 9   | A24        | EBV         | BRLF1 (28 – 37)     | DYCNVLNKEF       |
| Pep 10  | A68        | INFLUENZA A | NP (91 – 99)        | KTGGPIYKR        |
| Pep 11  | B7         | EBV         | EBNA 3A (379-387)   | RPPIFIRRL        |
| Pep 12  | B8         | EBV         | EBNA 3A (158 – 166) | QAKWRLQTL        |
| Pep 13  | B8         | EBV         | EBNA 3A (325-333)   | FLRGRAYGL        |
| Pep 14  | B8         | EBV         | BZLF1 (190 – 197)   | RAKFKQLL         |
| Pep 15  | B27        | EBV         | EBNA 3C (258 – 266) | RRIYDLIEL        |
| Pep 16  | B27        | INFLUENZA A | NP (383 – 391)      | SRYWAIRTR        |
| Pep 17  | B35        | EBV         | EBNA 3A (458 – 466) | YPLHEQHGM        |
| Pep 18  | B44        | HCMV        | Pp65 (512 – 521)    | EFFWDANDIY       |

\*EBV = Epstein Barr virus, HCMV = Human cytomegalovirus.

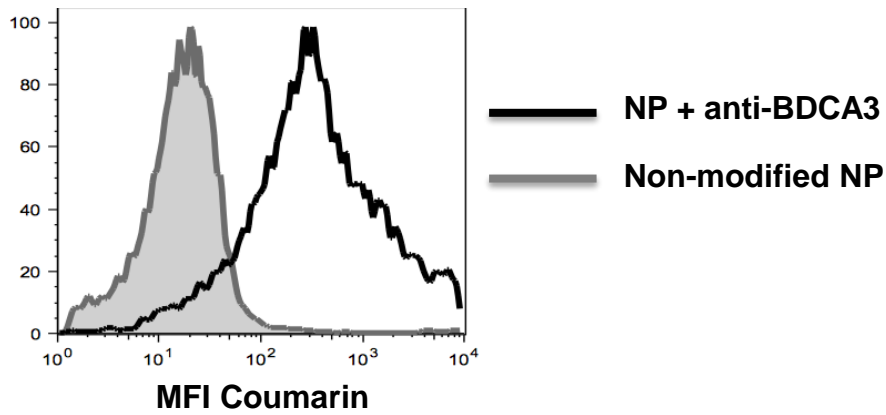

**Supplemental Fig. 1a: Evaluation of coupling of biotinylated antibody on the surface of avidin-coated NP. To detect the presence of biotin-labeled BDCA3 antibody (mouse IgG1, clone AD5-14H12) on the surface, NP were stained with rat anti-mouse IgG1-APC (clone X56) for 15 minutes and analyzed by FACSCalibur.**

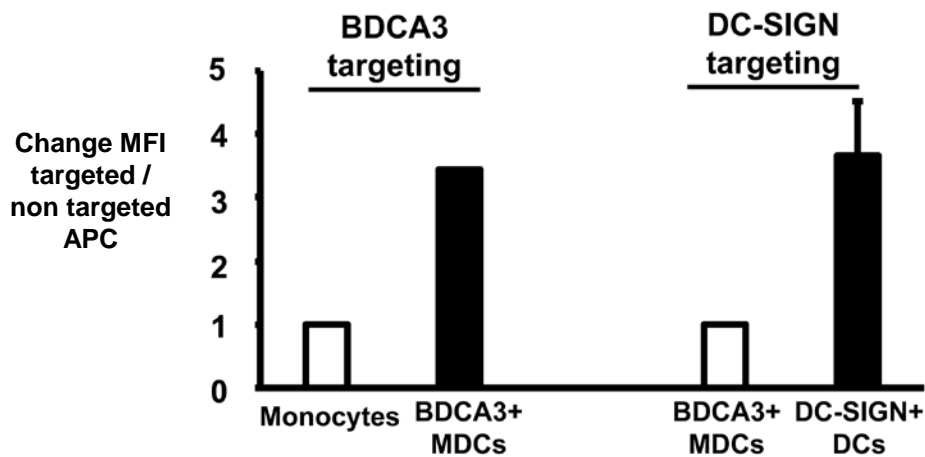

**Supplemental Fig. 1b: Coumarin-labeled NPs were coated with either anti-BDCA3 or anti DC-SIGN antibody and co-cultured with PBMCs for 30 min at 4°C. Figure shows change MFI of coumarin in targeted APCs versus non-targeted APCs.**

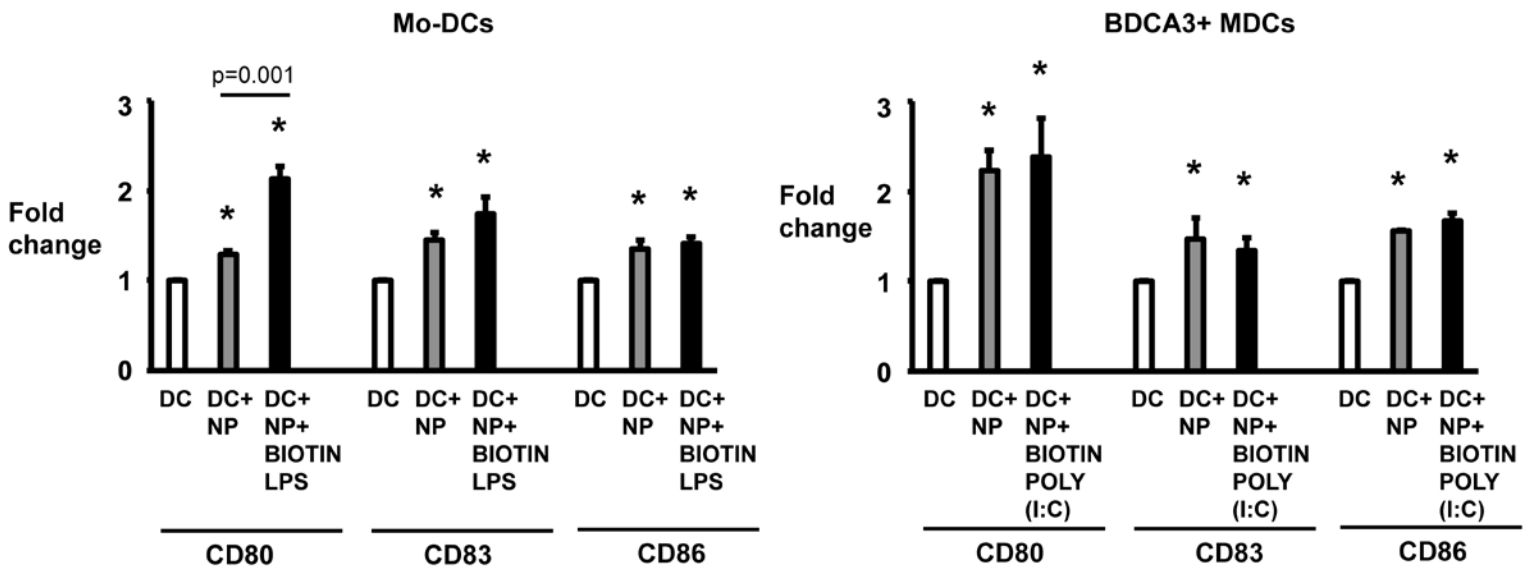

**Supplemental Fig. 1c: Bar graphs shows fold change MFI of CD80, CD83 and CD86 in DCs cultured alone or with NPs or NPs coated with TLRs (LPS or Poly (I:C)). \* represents significant p value compared to DC alone (DC).**
